# Supplementary material
Source: publisher site journal article supplement (https://www.spandidos-publications.com/8553/downloadSupplementary)
Supplement: Supplementary file 1 [file downloadSupplementary]

Table SI. Sequences of siRNAs.

| siRNA name                | Sequence (5'-3')                       |
|---------------------------|----------------------------------------|
| PGC-1 $\alpha$<br>siRNA-1 | Sense: GAACAUAUUCGAGAAGAUATT           |
|                           | Antisense: UAUCUUCUCGAAUAUGUUCTT       |
| PGC-1 $\alpha$<br>siRNA-2 | Sense: CGGAUAUACUCAUUAACAUTT           |
|                           | Antisense: AUGUAAAUGAGUAUAUCCGTT       |
| PGC-1 $\alpha$<br>siRNA-3 | Sense: CAGUAGAUCCUCUUAAGATT            |
|                           | Antisense: UCUUGAAGAGGAUCUACUGTT       |
| ATF5 siRNA-1              | Sense: GCUCGUAGACUAUGGGAAA(dT)(dT)     |
|                           | Antisense: UUUCCCAUAGUCUACGAGC(dT)(dT) |
| ATF5 siRNA-2              | Sense: GGAUACCCUGGACUUGCUA(dT)(dT)     |
|                           | Antisense: UAGCAAGUCCAGGGUAUCC(dT)(dT) |
| ATF5 siRNA-3              | Sense: GGGAGAUCAGUAUGUGAA(dT)(dT)      |
|                           | Antisense: UUCACAUACUGGAUCUCCC(dT)(dT) |
| Negative<br>siRNA         | Sense: UUC UCC GAA CGU GUC ACG UTT     |
|                           | Antisense: ACG UGA CAC GUU CGG AGA ATT |

PGC-1 $\alpha$ , peroxisome proliferative activated receptor  $\gamma$  coactivator 1 $\alpha$ ; ATF5, activating transcription factor 5; siRNA, small interfering RNA.

Table SII. Sequences of the primers used in reverse transcription-quantitative PCR.

| Gene name      | Primer sequence (5'-3')   |
|----------------|---------------------------|
| CTRP3          | F: AGCCATGCTAAAACGGGGAC   |
|                | R: AGGTGAAGAAATACACGCCTGA |
| PGC-1 $\alpha$ | F: AAGTGGTGTAGCGACCAATCG  |
|                | R: AATGAGGGCAATCCG TCTTCA |
| ATF5           | F: TCGGAGCGACATCGGTTTTA   |
|                | R: AGCGTTAAGGGAGATGCTTCA  |
| ClpP           | F: TCATGGGCCCGATTGATG     |
|                | R: GTGCAGATGGGGTTCAGAATA  |
| Hsp60          | F: GGCTATCGCTACTGGT       |
|                | R: GCAAGTCGCTCGTTCA       |
| LonP1          | F: CAGGCCACAGAAGGATTCACA  |
|                | R: GACCTCTTTCTTGCCTCGCT   |
| ND1            | F: TTATCCTCTTATCCGTCC TC  |
|                | R: TGTTAAGTCGAAGGGAGC     |
| $\beta$ -actin | F: CGTGAAAAGATGACCCAGATCA |
|                | R: CACAGCCTGGATGGCTACGTA  |

CTRP3, C1q-tumor necrosis factor-related protein-3; PGC-1 $\alpha$ , peroxisome proliferative activated receptor  $\gamma$  coactivator 1 $\alpha$ ; ATF5, activating transcription factor 5; ClpP, proteolytic subunit of the ATP-dependent Clp protease; Hsp60, 60 kDa heat shock protein; LonP1, Lon protease homolog; ND1, NADH dehydrogenase 1; F, forward; R, reverse.

Table SIII. List of antibodies used in immunofluorescent staining.

| Antibody                                  | Host species | Dilution | Supplier                          | Cat. no.  |
|-------------------------------------------|--------------|----------|-----------------------------------|-----------|
| CTRP3                                     | Rabbit       | 1:50     | Abcam                             | ab36870   |
| SIRT1                                     | Rabbit       | 1:50     | ABclonal Biotech Co., Ltd.        | A0230     |
| PGC-1 $\alpha$                            | Rabbit       | 1:50     | ABclonal Biotech Co., Ltd.        | A12348    |
| ATF5                                      | Rabbit       | 1:30     | ABclonal Biotech Co., Ltd.        | A3563     |
| NeuN                                      | Mouse        | 1:400    | Abcam                             | ab104224  |
| GFAP                                      | Mouse        | 1:200    | Cell Signaling Technologies, Inc. | 3670      |
| Iba1                                      | Goat         | 1:200    | Abcam                             | ab5076    |
| CoraLite594-conjugated donkey anti rabbit | Donkey       | 1:400    | Proteintech Group, Inc.           | SA00013-8 |
| CoraLite488-conjugated donkey anti-mouse  | Donkey       | 1:200    | Proteintech Group, Inc.           | SA00013-5 |
| FITC-conjugated donkey anti goat          | Donkey       | 1:200    | ABclonal Biotech Co., Ltd.        | AS032     |

Table SIV. List of antibodies used in western blotting.

| Antibody                        | Host species | Dilution | Supplier                   | Cat. no. |
|---------------------------------|--------------|----------|----------------------------|----------|
| CTRP3                           | Rabbit       | 1:1,000  | Abcam                      | ab36870  |
| SIRT1                           | Rabbit       | 1:500    | ABclonal Biotech Co., Ltd. | A0230    |
| PGC-1 $\alpha$                  | Rabbit       | 1:1,000  | ABclonal Biotech Co., Ltd. | A12348   |
| NRF1                            | Rabbit       | 1:1,000  | Abcam                      | ab175932 |
| TFAM                            | Rabbit       | 1:1,000  | Abcam                      | ab131607 |
| $\beta$ -actin                  | Rabbit       | 1:10,000 | ABclonal Biotech Co., Ltd. | AC026    |
| HRP-conjugated goat anti-rabbit | Goat         | 1:5,000  | ABclonal Biotech Co., Ltd. | AS014    |

PGC-1 $\alpha$ , peroxisome proliferative activated receptor  $\gamma$  coactivator 1 $\alpha$ ; TFAM, mitochondrial transcription factor A; NRF1, nuclear respiratory factor 1; CTRP3, C1q-tumor necrosis factor-related protein-3.

Table SV. Commercial assay kits used in biochemical assays.

| Kit                    | Companies                                  | Cat. no. |
|------------------------|--------------------------------------------|----------|
| Malondialdehyde        | Nanjing Jiancheng Bioengineering Institute | A003-1-2 |
| Protein carbonyl       | Nanjing Jiancheng Bioengineering Institute | A087-1-2 |
| Glutathione            | Nanjing Jiancheng Bioengineering Institute | A006-1-1 |
| Superoxide dismutase   | Nanjing Jiancheng Bioengineering Institute | A001-3-2 |
| Glutathione peroxidase | Nanjing Jiancheng Bioengineering Institute | A005-1-2 |
